# Supplementary material for: Energy metabolism regulates clathrin adaptors at the trans-Golgi network and endosomes
Source: PubMed Central journal article supplement — Mol Biol Cell. 2013 Mar 15;24(6):832–47. doi: 10.1091/mbc.E12-10-0750 (PMC3596253; doi:10.1091/mbc.e12-10-0750), 2013-03-15

Supplemental Figure 1. Adaptors partially co-localize with Sec7 during prolonged glucose starvation. Wild-type cells expressing Sec7-mCherry, Gga2-GFP (A) or Ent5-GFP (B) or Apl4-GFP (AP-1) (C) from their endogenous loci were imaged before or after 2 hours of glucose starvation.

Supplemental figure 2. Arf1, Pik1 and Sac1 modulate adaptor localization during glucose starvation. Quantification of puncta per cell for samples described in Figure 10. \*\*  $P < 0.01$ ; n.s., not significant. Charts show box-plot of data as described in Figure 1.

# Supplemental Figure 1

A

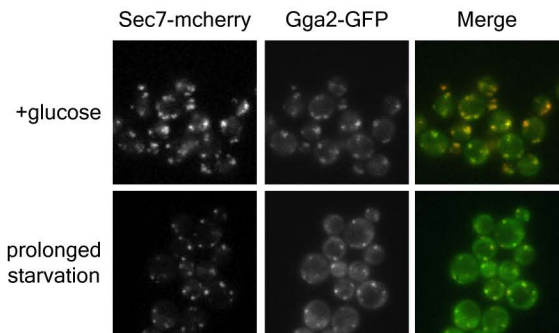

B

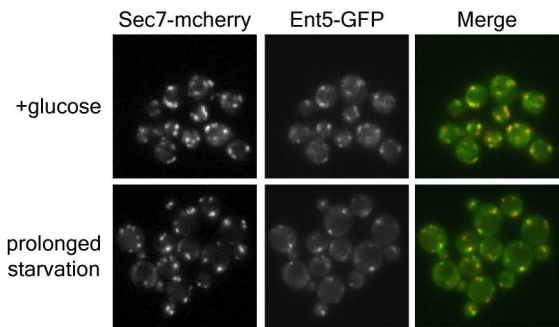

C

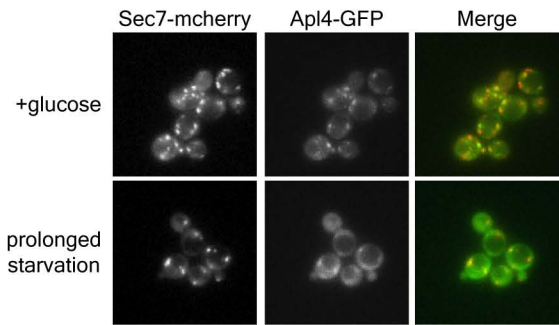

Gga2

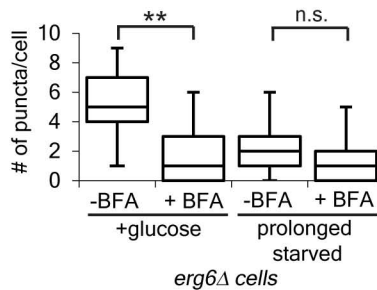

Ent5

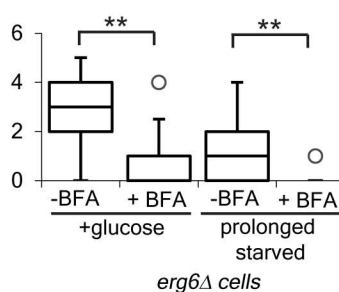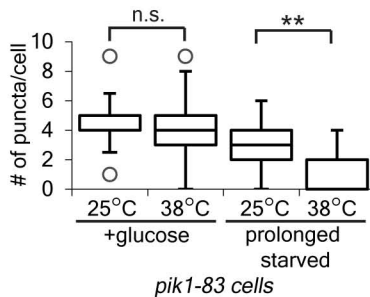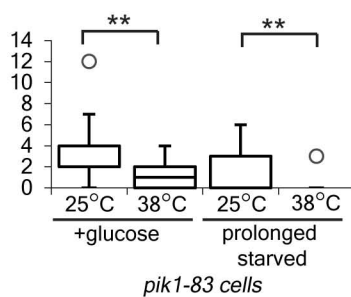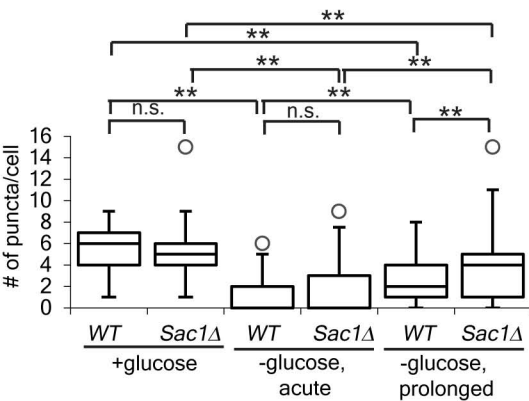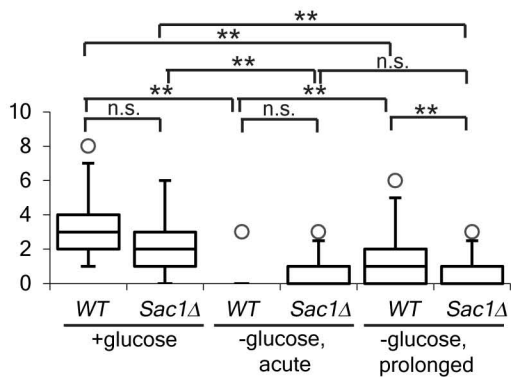

Supplement: supp_E12-10-0750v1_CombinedSupMats.pdf [file supp_E12-10-0750v1_CombinedSupMats.pdf]
